# Supplementary material for: High-Dose Intravenous Vitamin C Combined with Cytotoxic Chemotherapy in Patients with Advanced Cancer: A Phase I-II Clinical Trial
Source: PubMed Central journal article supplement (PMC4388666; doi:10.1371/journal.pone.0120228), 2015-04-07

## Text S1 Individual values for vitamin C and oxalic acid concentrations and individual plasma vitamin C time-course profiles

### Individual data points for Table 3 (Pharmacokinetic profiles before and after chemotherapy)

| Before chemotherapy                                |           |           |           |           |           |           |           |           |           |            |            |            |
|----------------------------------------------------|-----------|-----------|-----------|-----------|-----------|-----------|-----------|-----------|-----------|------------|------------|------------|
| Parameter                                          | Patient 1 | Patient 2 | Patient 3 | Patient 4 | Patient 5 | Patient 6 | Patient 7 | Patient 8 | Patient 9 | Patient 10 | Patient 11 | Patient 12 |
| Vit C dose infused (g)                             | 36        | 50        | 44        | 46        | 41        | 45        | 45        | 43        | 43        | 45         | 35         | 41         |
| Vit C dose (mmol)                                  | 204       | 284       | 250       | 261       | 233       | 256       | 256       | 244       | 244       | 256        | 199        | 233        |
| Baseline plasma conc (µmol/L)                      | 47        | 9.5       | 35        | 29        | 84        | 28        | 47        | 292       | 36        | 56         | 38         | 96         |
| Plasma conc end of infusion (mmol/L)               | 13.5      | 15.0      | 13.2      | 13.9      | 19.6      | 13.6      | 14.9      | 10.9      | 15.1      | 12.7       | 14.2       | 10.8       |
| Plasma conc 4h later (mmol/L)                      | 3.1       | 3.1       | 4.0       | 2.3       | 3.5       | 1.7       | 4.2       | 3.8       | 7.0       | 5.1        | 5.4        | 2.1        |
| Vit excretion by end of infusion (mmol)            | 51.4      | 22.8      | 69.9      | 100       | 55.1      | 39.4      | 43.5      | 17.5      | 48.5      | 38.4       | 53.2       | 76.6       |
| % of dose                                          | 25        | 8         | 28        | 38        | 24        | 15        | 17        | 7         | 20        | 15         | 27         | 33         |
| Total excretion by 4h after end of infusion (mmol) | 157       | 49.9      | 179       | 225       | 185       | 117       | 142       | 115       | 146       | 162        | 102        | 214        |
| % of dose                                          | 77        | 18        | 72        | 86        | 79        | 46        | 56        | 47        | 60        | 63         | 51         | 92         |
| Oxalic acid excretion by end of infusion (mg)      | 14.07     | 5.98      | 28.93     | 18.04     | 6.78      | 8.08      | 6.00      | 6.55      | 11.98     | 6.31       | 7.37       | 10.65      |
| Total excretion by 4h after end of infusion (mg)   | 52.51     | 13.95     | 87.01     | 59.69     | 32.63     | 43.23     | 23.00     | 43.25     | 35.94     | 30.63      | 22.54      | 43.73      |
| % of vitamin C dose                                | 0.29      | 0.05      | 0.39      | 0.25      | 0.16      | 0.19      | 0.10      | 0.20      | 0.16      | 0.13       | 0.13       | 0.21       |

| After chemotherapy                                 |           |           |           |           |           |           |           |           |           |            |            |            |
|----------------------------------------------------|-----------|-----------|-----------|-----------|-----------|-----------|-----------|-----------|-----------|------------|------------|------------|
| Parameter                                          | Patient 1 | Patient 2 | Patient 3 | Patient 4 | Patient 5 | Patient 6 | Patient 7 | Patient 8 | Patient 9 | Patient 10 | Patient 11 | Patient 12 |
| Vit C dose infused (g)                             | 36        | 50        | 44        | 46        | 41        | 45        | 45        | 43        | 43        | 45         | 35         | 41         |
| Vit C dose (mmol)                                  | 204       | 284       | 250       | 261       | 233       | 256       | 256       | 244       | 244       | 256        | 199        | 233        |
| Baseline plasma conc (µmol/L)                      | 69        | 49        | 74        | 81        | 138       | 67        | 130       | 173       | 429       | 169        | 103        | 97         |
| Plasma conc end of infusion (mmol/L)               | 13.2      | 12.4      | 15.7      | 13.5      | 18.4      | 11.3      | 13.6      | 9.3       | 14.9      | 12.7       | 13.3       | 13.5       |
| Plasma conc 4h later (mmol/L)                      | 2.9       | 2.9       | 4.3       | 3.4       | 2.3       | 1.7       | 4.5       | 3.6       | 7.1       | 4.3        | 3.5        | 3.2        |
| Vit excretion by end of infusion (mmol)            | 55.2      | 13.8      | 46.3      | 42.7      | 71.5      | 24.3      | 29.6      | 25.7      | 44.7      | 29.7       | 31.7       | 55.7       |
| % of dose                                          | 27        | 5         | 19        | 16        | 31        | 10        | 12        | 11        | 18        | 12         | 16         | 24         |
| Total excretion by 4h after end of infusion (mmol) | 149       | 48.8      | 176       | 169       | 144       | 87.0      | 172       | 119       | 158       | 156        | 89.4       | 124        |
| % of dose                                          | 73        | 17        | 70        | 65        | 62        | 34        | 67        | 49        | 65        | 61         | 45         | 53         |
| Oxalic acid excretion by end of infusion (mg)      | 34.10     | 3.41      | 27.01     | 10.07     | 8.73      | 10.82     | 3.94      | 9.76      | 18.82     | 5.88       | 6.12       | 8.70       |
| Total excretion by 4h after end of infusion (mg)   | 66.81     | 13.48     | 79.00     | 53.48     | 22.75     | 51.09     | 29.58     | 38.85     | 55.53     | 29.20      | 21.61      | 29.78      |
| % of vitamin C dose                                | 0.36      | 0.05      | 0.35      | 0.23      | 0.11      | 0.22      | 0.13      | 0.18      | 0.25      | 0.13       | 0.12       | 0.14       |

### Individual data points for Fig 2 (Plasma vit C concentration profiles $\mu\text{mol/L}$ before and after chemotherapy)

#### Before chemotherapy

| Time (hours) | Patient 1 | Patient 2 | Patient 3 | Patient 4 | Patient 5 | Patient 6 | Patient 7 | Patient 8 | Patient 9 | Patient 10 | Patient 11 | Patient 12 |
|--------------|-----------|-----------|-----------|-----------|-----------|-----------|-----------|-----------|-----------|------------|------------|------------|
| 0            | 47        | 10        | 35        | 29        | 84        | 28        | 47        | 292       | 36        | 56         | 38         | 96         |
| 0.5          | 6576      | 6297      | 5097      | 7370      | 9791      | 6093      | 7110      | 4814      | 7344      | 7725       | 7669       | 6138       |
| 1            | 9393      | 11044     | 9389      | 11209     | 16490     | 10645     | 11491     | 8321      | 12190     | 9910       | 11395      | 9550       |
| 1.25         | 11176     | 11905     | 11132     | 11912     | 17310     | 11826     | 12618     | 9534      | 13080     | 10709      | 12569      | 10736      |
| 1.5          | 13534     | 14947     | 13164     | 13926     | 19596     | 13635     | 14851     | 10876     | 15135     | 12679      | 14230      | 10828      |
| 1.75         | 11101     | 12142     | 12960     | 11760     | 13844     | 11519     | 12297     | 9065      | 13970     | 11363      | 13223      | 10367      |
| 2            | 10770     | 10902     | 12266     | 10500     | 12044     | 9395      | 11103     | 8542      | 12917     | 10711      | 12422      | 9117       |
| 2.25         | 8961      | 8873      | 11208     | 8956      | 10235     | 8462      | 8394      | 7930      | 12907     | 10183      | 11768      | 8138       |
| 2.5          | 8167      | 8280      | 10529     | 8517      | 10159     | 7570      | 8765      | 7528      | 12059     | 9509       | 10498      | 7221       |
| 3            | 7588      | 7033      | 8379      | 6426      | 7280      | 6297      | 7113      | 6826      | 11547     | 8594       | 9761       | 5763       |
| 3.5          | 5931      | 6318      | 7617      | 4876      | 6033      | 5166      | 7227      | 6306      | 10711     | 7494       | 9022       | 4657       |
| 4            | 4114      | 5187      | 6443      | 3805      | 5120      | 4330      | 5863      | 5625      | 9296      | 6156       | 7433       | 5760*      |
| 4.5          | 3726      | 4369      | 5611      | 3115      | 4630      | 3003      | 5785      | 4656      | 7712      | 5786       | 6738       | 2733       |
| 5            | 3681      | 3924      | 4721      | 3212      | 4018      | 2505      | 4926      | 4374      | 7584      | 5262       | 6022       | 2276       |
| 5.5          | 3092      | 3120      | 3960      | 2311      | 3482      | 1692      | 4150      | 3820      | 6972      | 5101       | 5426       | 2047       |

#### After chemotherapy

| Time (hours) | Patient 1 | Patient 2 | Patient 3 | Patient 4 | Patient 5 | Patient 6 | Patient 7 | Patient 8 | Patient 9 | Patient 10 | Patient 11 | Patient 12 |
|--------------|-----------|-----------|-----------|-----------|-----------|-----------|-----------|-----------|-----------|------------|------------|------------|
| 0            | 69        | 49        | 74        | 81        | 138       | 67        | 130       | 173       | 429       | 169        | 103        | 97         |
| 0.5          | 7281      | 4633      | 5939      | 6462      | 6330*     | 4868      | 5169      | 3843      | 7263      | 7857       | 7260       | 9068       |
| 1            | 10397     | 8454      | 10419     | 11213     | 16898     | 9375      | 9845      | 6625      | 12367     | 10575      | 11547      | 11374      |
| 1.25         | 11525     | 11435     | 14055     | 11916     | 18370     | 10963     | 11811     | 8190      | 13655     | 11659      | 12226      | 13204      |
| 1.5          | 12226     | 11501     | 15729     | 13484     | 18041     | 11293     | 13579     | 9283      | 14889     | 12701      | 13308      | 13445      |
| 1.75         | 13228     | 12352     | 14083     | 11975     | 14489     | 9668      | 11730     | 8223      | 13788     | 11278      | 11810      | 11774      |
| 2            | 9776      | 11047     | 12407     | 11513     | 12355     | 8843      | 10685     | 7558      | 13407     | 10284      | 11021      | 9910       |
| 2.25         | 7942      | 8624      | 11833     | 10494     | 10710     | 7554      | 9839      | 6556      | 12545     | 8817       | 10311      | 9415       |
| 2.5          | 7089      | 7558      | 10399     | 9435      | 9585      | 6733      | 8805      | 6556      | 12310     | 8859       | 9953       | 8254       |
| 3            | 6246      | 6609      | 9340      | 6791      | 7473      | 5507      | 7687      | 5764      | 10958     | 7081       | 8741       | 6294       |
| 3.5          | 5214      | 5266      | 7812      | 6026      | 5004      | 4466      | 6151      | 5310      | 9934      | 6917       | 7744       | 5430       |
| 4            | 3800      | 4473      | 6888      | 4835      | 4096      | 3688      | 5605      | 4698      | 9296      | 5853       | 6222       | 4712       |
| 4.5          | 3454      | 3788      | 6095      | 3705      | 3552      | 2872      | 5036      | 3851      | 8690      | 5596       | 5372       | 3675       |
| 5            | 3345      | 3316      | 4904      | 2668      | 2901      | 2216      | 3404      | 4468      | 7552      | 4557       | 4283       | 2845       |
| 5.5          | 2900      | 2898      | 4327      | 3384      | 2299      | 1707      | 4455      | 3629      | 7089      | 4301       | 3515       | 3161       |

\* 2 missing values interpolated from averages of all other values for that time.

### Individual data for Fig 2 statement of AUC (area under the curve) in $\text{mmol.h/L}$ before and after chemotherapy

| Patient | Before chemo | After chemo |
|---------|--------------|-------------|
| 1       | 36.81        | 35.26       |
| 2       | 39.23        | 34.25       |
| 3       | 42.39        | 46.02       |
| 4       | 36.49        | 38.25       |
| 5       | 47.12        | 44.04       |
| 6       | 34.52        | 30.00       |
| 7       | 42.22        | 38.36       |
| 8       | 33.15        | 28.26       |
| 9       | 54.75        | 52.69       |
| 10      | 42.68        | 40.09       |
| 11      | 48.74        | 42.88       |
| 12      | 31.23        | 38.09       |

Plasma Vit C before chemotherapy

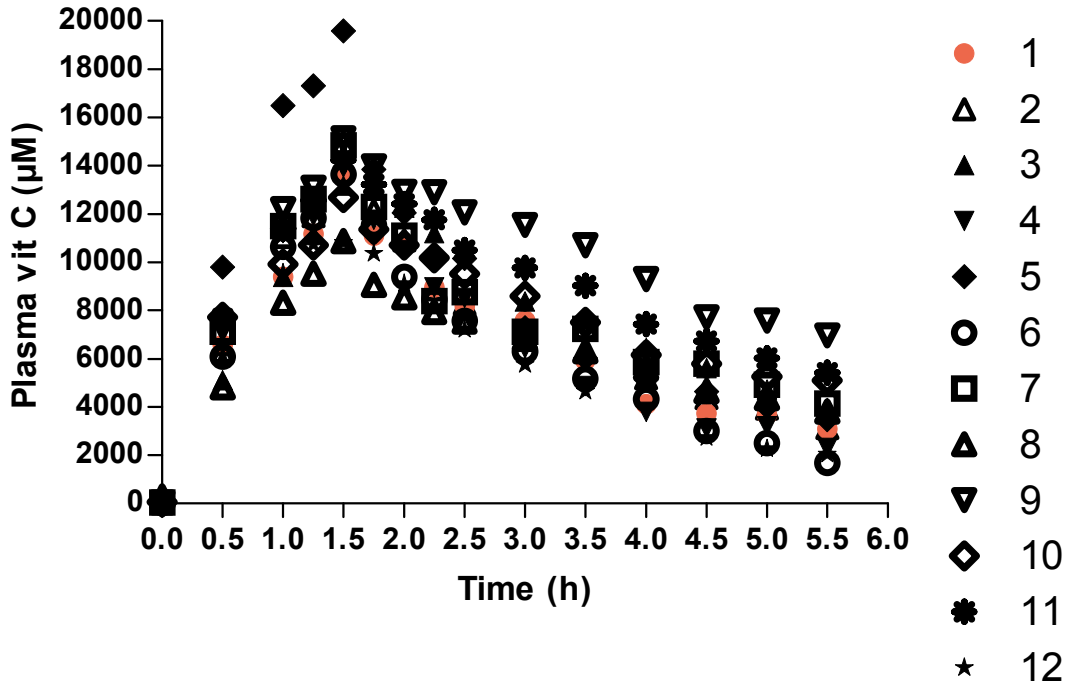

Plasma Vit C after chemotherapy

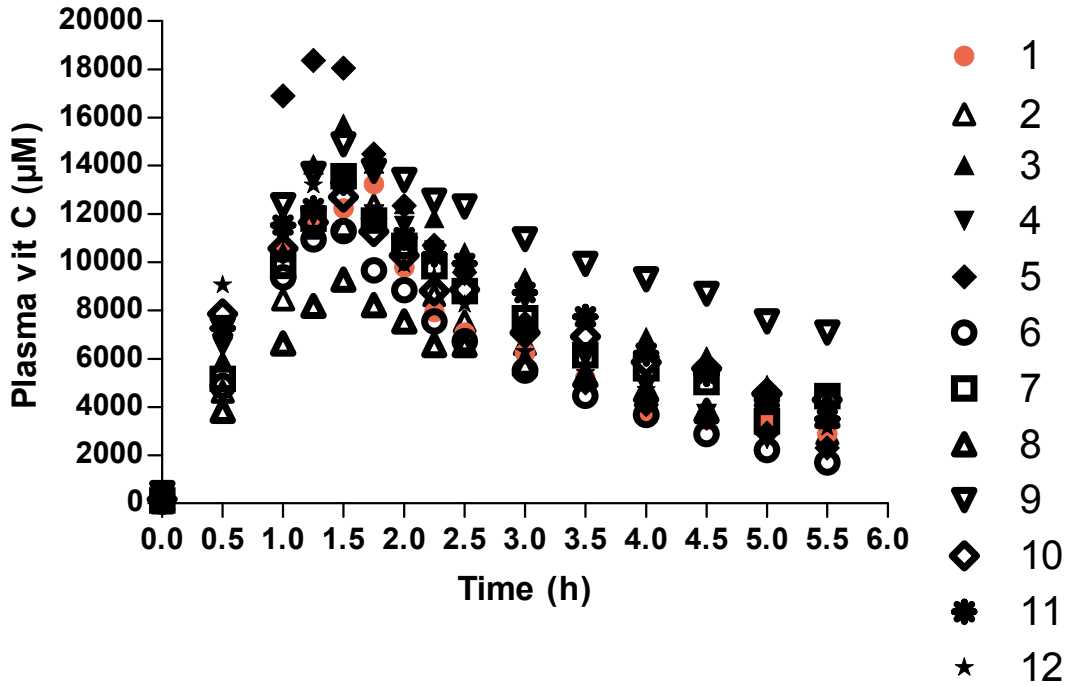

# Plasma vit C before and after chemotherapy

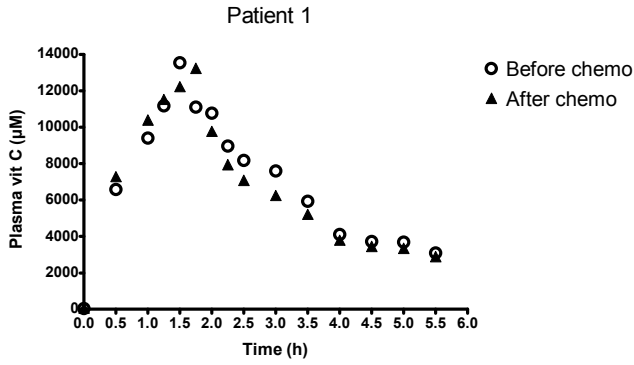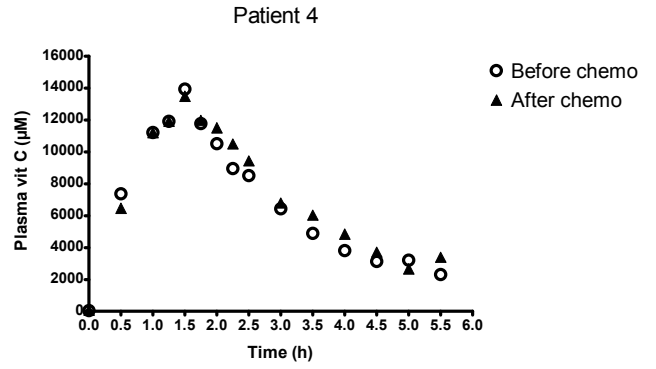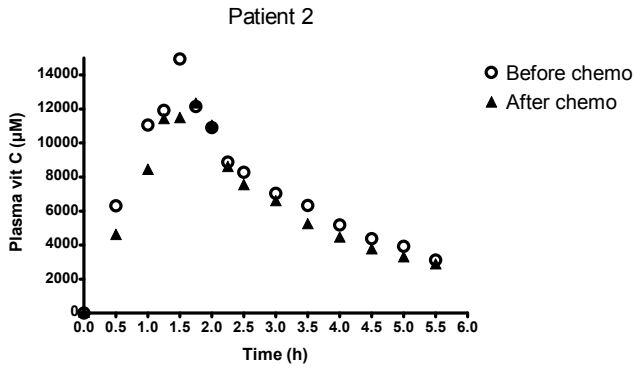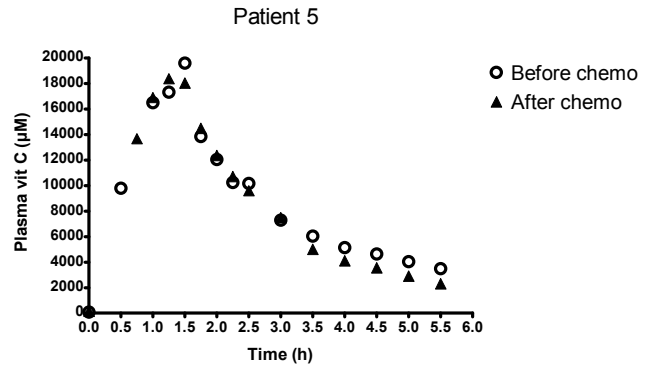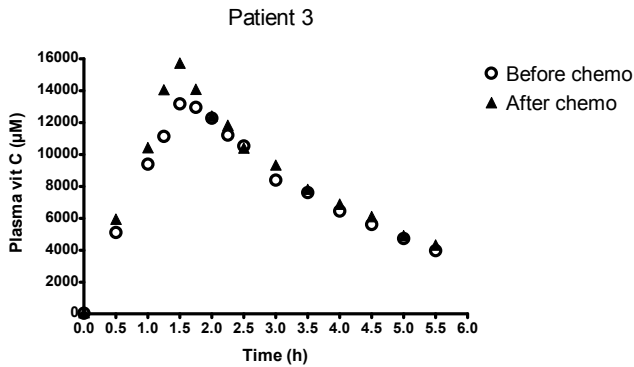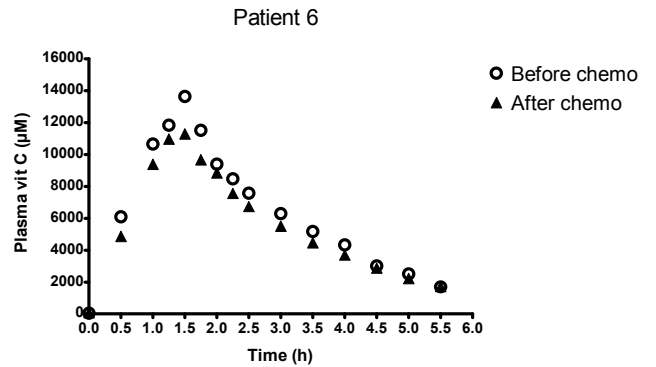

# Plasma vit C before and after chemotherapy

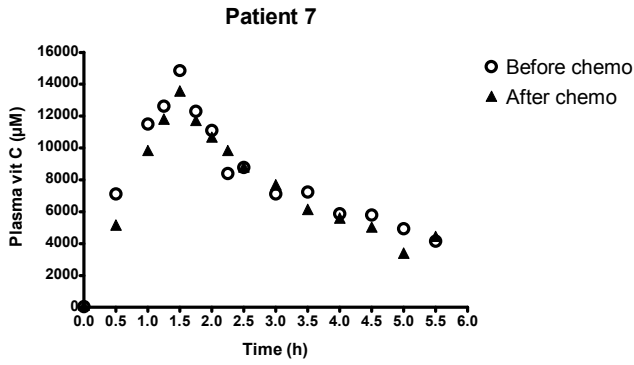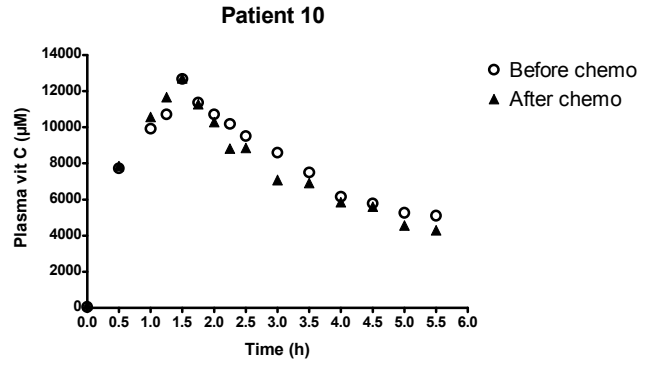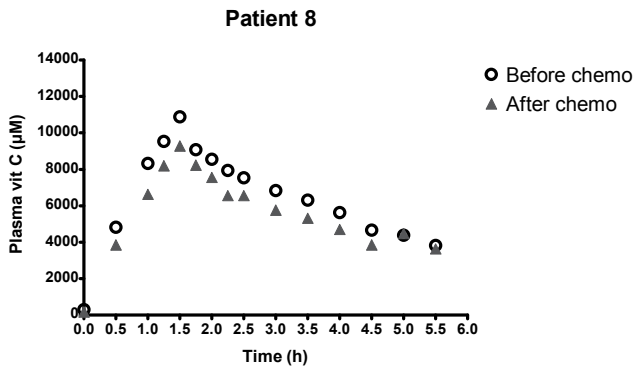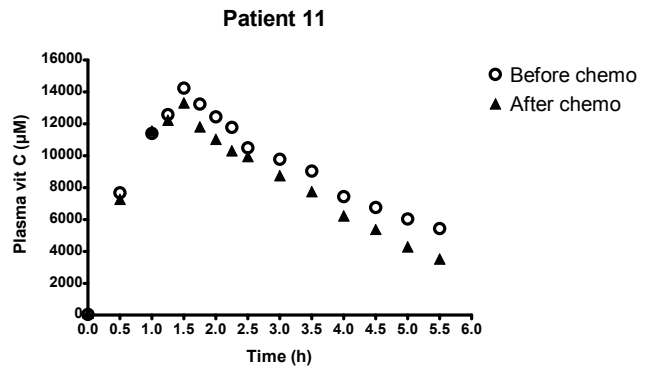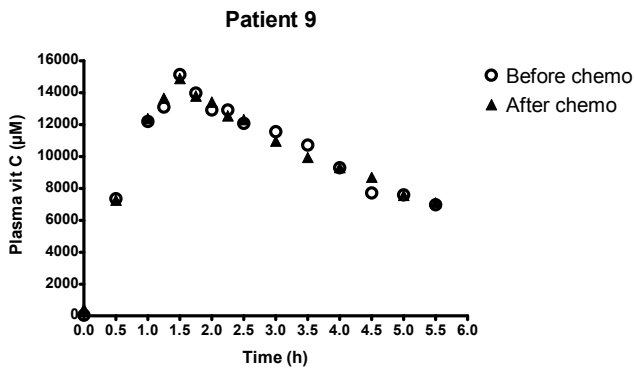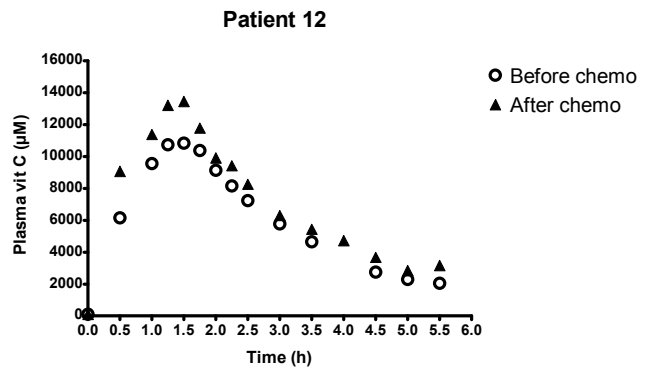

Supplement: pone.0120228.s003.pdf [file pone.0120228.s003.pdf]
